# Supplementary material for: Invasive meningococcal disease in Shanghai, China from 1950 to 2016: implications for serogroup B vaccine implementation
Source: PubMed Central journal article supplement (PMC6098053; doi:10.1038/s41598-018-30048-x), 2018-08-17
Supplement: 41598_2018_30048_MOESM1_ESM.pdf [file 41598_2018_30048_MOESM1_ESM.pdf]

## Supplementary material

Invasive meningococcal disease in Shanghai, China from 1950 to 2016: implications for serogroup B vaccine implementation

Mingliang Chen<sup>1,2,3</sup>, Charlene M.C. Rodrigues<sup>2</sup>, Odile B. Harrison<sup>2</sup>, Chi Zhang<sup>1</sup>, Tian Tan<sup>1</sup>, Jian Chen<sup>1</sup>, Xi Zhang<sup>1</sup>, Min Chen<sup>1</sup>, Martin C.J. Maiden<sup>2</sup>

<sup>1</sup> Department of Microbiology and Division of Infectious Diseases, Shanghai

Municipal Center for Disease Control and Prevention, Shanghai, China;

<sup>2</sup> Department of Zoology, University of Oxford, Oxford, United Kingdom;

<sup>3</sup> Department of Microbiology, Shanghai Institutes of Preventive Medicine, Shanghai, China

**Table S1. Analysis of 20 surveys of meningococcal carriage in Shanghai from 1965 to 2016.**

| Year | Incidence<br>(/100,000) | Number of<br>throat swabs | Isolates              |                                  | Serogroup (%) |           |           |         |
|------|-------------------------|---------------------------|-----------------------|----------------------------------|---------------|-----------|-----------|---------|
|      |                         |                           | (carriage<br>rate, %) | Isolates tested<br>for serogroup | A             | B         | C         | Other   |
| 1965 | 139.5                   | 5,367                     | 253 (4.7)             | 0                                | ND*           | ND        | ND        | ND      |
| 1966 | 210.7                   | 249                       | 39 (15.6)             | 13                               | 10 (76.9)     | 1 (7.7)   | 1 (7.7)   | 1 (7.7) |
| 1967 | 433.8                   | 5,590                     | 1,347 (24.1)          | 259                              | 188 (72.6)    | 44 (17.0) | 21 (8.1)  | 6 (2.3) |
| 1970 | 5.9                     | 818                       | 86 (10.5)             | 12                               | 6 (50)        | 0         | 6 (50)    | 0       |
| 1971 | 4.2                     | 897                       | 77 (8.6)              | 9                                | 5 (55.6)      | 0         | 4 (44.4)  | 0       |
| 1972 | 2.7                     | 4,639                     | 111 (2.4)             | 71                               | 10 (14.1)     | 43 (60.6) | 18 (25.3) | 0       |
| 1973 | 2.0                     | 2,025                     | 69 (3.4)              | 22                               | 3 (13.6)      | 19 (86.4) | 0         | 0       |
| 1974 | 1.9                     | 1,299                     | 68 (5.2)              | 0                                | ND            | ND        | ND        | ND      |
| 1975 | 2.6                     | 855                       | 43 (5.0)              | 10                               | 0             | 10 (100)  | 0         | 0       |

|      |       |       |           |     |         |            |          |           |
|------|-------|-------|-----------|-----|---------|------------|----------|-----------|
| 1976 | 3.0   | 779   | 52 (6.7)  | 35  | 0       | 29 (82.9)  | 6 (17.1) | 0         |
| 1977 | 6.1   | 3,561 | 289 (8.1) | 223 | 3 (1.3) | 196 (87.9) | 18 (8.1) | 6 (2.7)   |
| 1978 | 3.1   | 2,326 | 221 (9.5) | 184 | 1 (0.5) | 146 (79.3) | 11 (6.0) | 26 (14.1) |
| 1979 | 3.2   | 2,361 | 177 (7.5) | 177 | 2 (1.1) | 123 (69.5) | 12 (6.8) | 40 (22.6) |
| 2007 | 0.13  | 553   | 11 (2.0)  | 11  | 0       | 11 (100)   | 0        | 0         |
| 2010 | 0.01  | 644   | 4 (0.6)   | 4   | 0       | 2 (50)     | 0        | 2 (50)    |
| 2011 | 0.02  | 210   | 1 (0.5)   | 1   | 0       | 1 (100)    | 0        | 0         |
| 2013 | 0.02  | 1,500 | 17 (1.1)  | 17  | 0       | 16 (94.1)  | 0        | 1 (5.9)   |
| 2014 | 0.02  | 3,330 | 54 (1.6)  | 54  | 0       | 45 (83.3)  | 2 (3.7)  | 5 (9.3)   |
| 2015 | 0.008 | 360   | 5 (1.4)   | 5   | 0       | 3 (60)     | 0        | 2 (40)    |
| 2016 | 0.01  | 240   | 2 (0.8)   | 2   | 0       | 0          | 0        | 2 (100)   |

\* ND, not determined.

**Table S2. Variants used to assess the strain coverage of serogroup B vaccines**

| Vaccines | Exact matches                                                                                                                | cross-reactive matches                                                                                       | References |
|----------|------------------------------------------------------------------------------------------------------------------------------|--------------------------------------------------------------------------------------------------------------|------------|
| Bexsero  | fHbp variant 1, NHBA variant 2,<br>NadA variant 8, or PorA-VR2: 4                                                            | fHbp variants: 1, 4, 13, 14, 15,<br>37, or 232;<br>or NadA family: 1 or 2/3                                  | 1          |
| Trumenba | fHbp variants: 45 or 55                                                                                                      | fHbp variants: 1, 4, 13, 14, 15,<br>16, 19, 21, 23, 24, 25, 30, 47,<br>76, 87, 180, 187, 252, 276, or<br>510 | 2-5        |
| NonaMen  | PorA variants: P1.7,16, P1.5-1,2-2,<br>P1.19,15-1, P1.5-2,10, P1.12-1,13,<br>P1.7-2,4, P1.22,14, P1.7-1,1, or<br>P1.18-1,3,6 | NA*                                                                                                          | 6          |

\* NA, not applicable.

**Figure S1. Five sequence clusters identified in this study.** Sequence types that have no more than 3 different loci with each other, but not assigned in MLST database were assigned to the same cluster. ST-5620 cluster included ST-5542, ST-5620, ST-10395, ST-11040, ST-11041, ST-11044 and ST-12877; ST-5662 cluster was composed of ST-3129, ST-5658, ST-5751, ST-8208, ST-8686, ST-9472, ST-9582, ST-9583, ST-9758, ST-9760, ST-10378, ST-10382, ST-10401, ST-10412, ST-10414, ST-10453, ST-11046, ST-12865, ST-12866, ST-13498, ST-13499, and ST-13504; ST-5819 cluster included ST-5819, ST-8788, ST-10108, ST-11042, ST-11043, ST-11047, ST-12861, ST-12864 and ST-12869; ST-5863 cluster was composed of ST-4830, ST-5636, ST-5863, ST-9587, ST-9588, ST-12860, ST-12862, ST-12867 and ST-12879; ST-9514 cluster included ST-4822, ST-9506, ST-9514, ST-9757 and ST-10398.

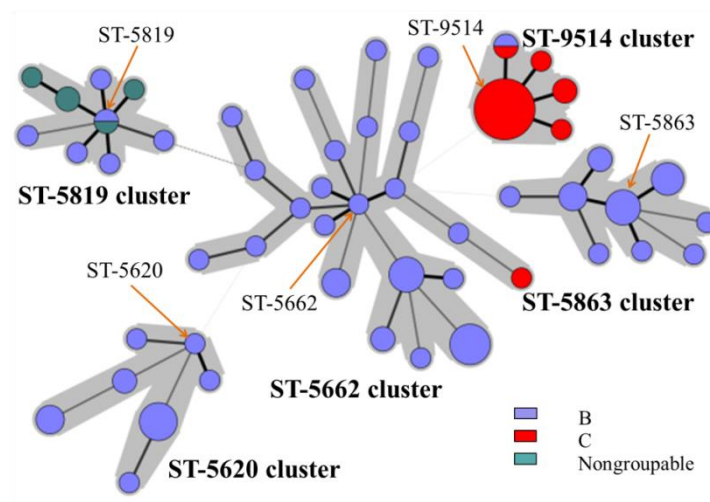

**Figure S1**

## References

1. Charlene, M. C. R. *et al.* Genomic surveillance of 4CMenB vaccine antigenic variants among disease-causing *Neisseria meningitidis* isolates, United Kingdom, 2010–2016. *Emerg Infect Dis* **24**, doi:10.3201/eid2404.171480 (2018).
2. Taha, M. K. *et al.* Bactericidal activity of sera from adolescents vaccinated with bivalent rLP2086 against meningococcal serogroup B outbreak strains from France. *Vaccine* **35**, 1530-1537, doi:10.1016/j.vaccine.2017.01.066 (2017).
3. Ostergaard, L. *et al.* A bivalent meningococcal B vaccine in adolescents and young adults. *N Engl J Med* **377**, 2349-2362, doi:10.1056/NEJMoa1614474 (2017).
4. Lujan, E., Partridge, E., Giuntini, S., Ram, S. & Granoff, D. M. Breadth and duration of meningococcal serum bactericidal activity in healthcare workers and microbiologists immunized with the MenB-FHbp vaccine. *Clin Vaccine Immunol* **24**, e00121-00117, doi:10.1128/CVI.00121-17 (2017).
5. Harris, S. L. *et al.* *Neisseria meningitidis* serogroup B vaccine, bivalent rLP2086, induces broad serum bactericidal activity against diverse invasive disease strains including outbreak strains. *Pediatr Infect Dis J* **36**, 216-223, doi:10.1097/INF.0000000000001399 (2017).
6. Kaaijk, P. *et al.* Preclinical safety and immunogenicity evaluation of a nonavalent PorA native outer membrane vesicle vaccine against serogroup B meningococcal disease. *Vaccine* **31**, 1065-1071, doi:10.1016/j.vaccine.2012.12.031 (2013)
